# Supplementary material for: NOD1/RIP2 signalling enhances the microglia-driven inflammatory response and undergoes crosstalk with inflammatory cytokines to exacerbate brain damage following intracerebral haemorrhage in mice
Source: Springer Nature journal article supplement (doi:10.1186/s12974-020-02015-9), 2020-12-01

**A**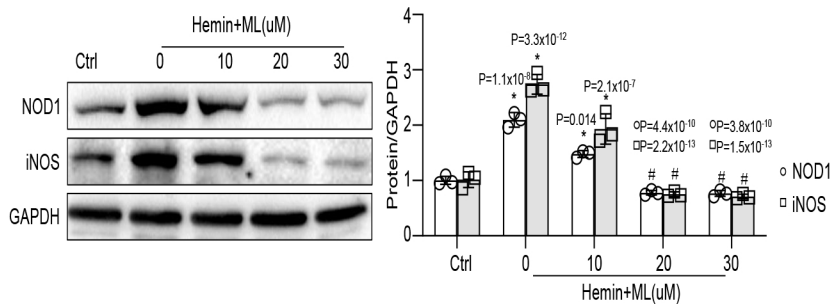**B**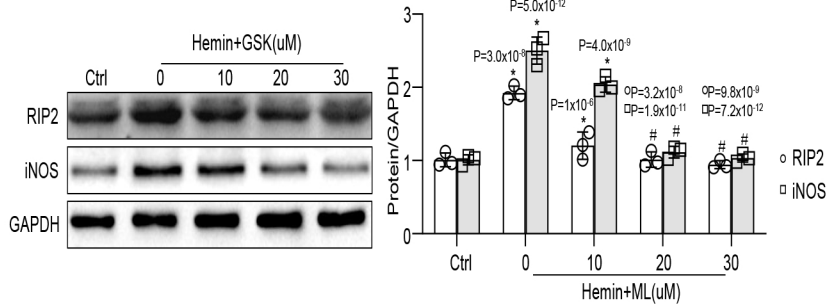

Supplement: 12974_2020_2015_MOESM1_ESM.pdf [file 12974_2020_2015_MOESM1_ESM.pdf]
